# Supplementary material
Source: MDPI journal article supplement (https://www.mdpi.com/2073-4352/2/2/521)
Supplement: s1 [file s1]

 
data_shelxl
 
_audit_creation_method            SHELXL-97
_chemical_name_systematic
;
 ?
;
_chemical_name_common             ?
_chemical_melting_point           ?
_chemical_formula_moiety          ?
_chemical_formula_sum
 'C11 H14 O4'
_chemical_formula_weight          210.22
_chemical_oxdiff_usercomment 'FH-1 Imitiaz khan'

 
loop_
 _atom_type_symbol
 _atom_type_description
 _atom_type_scat_dispersion_real
 _atom_type_scat_dispersion_imag
 _atom_type_scat_source
 'C'  'C'   0.0033   0.0016
 'International Tables Vol C Tables 4.2.6.8 and 6.1.1.4'
 'H'  'H'   0.0000   0.0000
 'International Tables Vol C Tables 4.2.6.8 and 6.1.1.4'
 'O'  'O'   0.0106   0.0060
 'International Tables Vol C Tables 4.2.6.8 and 6.1.1.4'
 
_symmetry_space_group_name_H-M 'P -1'
_symmetry_cell_setting triclinic
 
loop_
 _symmetry_equiv_pos_as_xyz
 'x, y, z'
 '-x, -y, -z'
 
_cell_length_a                    8.5518(3)
_cell_length_b                    10.8826(8)
_cell_length_c                    11.9939(6)
_cell_angle_alpha                 101.273(5)
_cell_angle_beta                  98.287(3)
_cell_angle_gamma                 94.092(4)
_cell_volume                      1077.54(10)
_cell_formula_units_Z             4
_cell_measurement_temperature   130.0(2) 
_cell_measurement_reflns_used   4650
_cell_measurement_theta_min     2.9241
_cell_measurement_theta_max     28.9738
 
_exptl_crystal_description        block
_exptl_crystal_colour             colourless
_exptl_crystal_size_max           0.6
_exptl_crystal_size_mid           0.5
_exptl_crystal_size_min           0.3
_exptl_crystal_density_meas       ?
_exptl_crystal_density_diffrn     1.296
_exptl_crystal_density_method     'not measured'
_exptl_crystal_F_000              448
_exptl_absorpt_coefficient_mu     0.098
_exptl_absorpt_correction_T_min                   0.72479
_exptl_absorpt_correction_T_max                   1.00000
_exptl_absorpt_correction_type            'multi-scan'
_exptl_absorpt_process_details
;
CrysAlisPro, Agilent Technologies,
Version 1.171.35.15 (release 03-08-2011 CrysAlis171 .NET)
(compiled Aug  3 2011,13:03:54)
Empirical absorption correction using spherical harmonics,
 implemented in SCALE3 ABSPACK scaling algorithm.
;
_exptl_special_details
;
 ?
;
 
_diffrn_ambient_temperature 130.0(2) 
_diffrn_radiation_wavelength 0.7107
_diffrn_radiation_type 'Mo K\a'
_diffrn_radiation_source 'SuperNova (Mo) X-ray Source'
_diffrn_radiation_monochromator 'mirror'
_diffrn_measurement_device_type 'SuperNova, Dual, Cu at zero, Atlas'
_diffrn_measurement_method '\w scans'
_diffrn_detector_area_resol_mean  ?
_diffrn_standards_number          ?
_diffrn_standards_interval_count  ?
_diffrn_standards_interval_time   ?
_diffrn_standards_decay_%         ?
_diffrn_reflns_number             7807
_diffrn_reflns_av_R_equivalents   0.0202
_diffrn_reflns_av_sigmaI/netI     0.0289
_diffrn_reflns_limit_h_min        -9
_diffrn_reflns_limit_h_max        10
_diffrn_reflns_limit_k_min        -12
_diffrn_reflns_limit_k_max        10
_diffrn_reflns_limit_l_min        -14
_diffrn_reflns_limit_l_max        13
_diffrn_reflns_theta_min          2.93
_diffrn_reflns_theta_max          25.00
_reflns_number_total              3782
_reflns_number_gt                 3204
_reflns_threshold_expression      >2sigma(I)
 
_computing_data_collection
;
CrysAlisPro, Agilent Technologies,
Version 1.171.35.15 (release 03-08-2011 CrysAlis171 .NET)
(compiled Aug  3 2011,13:03:54)
;
_computing_cell_refinement
;
CrysAlisPro, Agilent Technologies,
Version 1.171.35.15 (release 03-08-2011 CrysAlis171 .NET)
(compiled Aug  3 2011,13:03:54)
;
_computing_data_reduction
;
CrysAlisPro, Agilent Technologies,
Version 1.171.35.15 (release 03-08-2011 CrysAlis171 .NET)
(compiled Aug  3 2011,13:03:54)
;
_computing_structure_solution     ?
_computing_structure_refinement   'SHELXL-97 (Sheldrick, 1997)'
_computing_molecular_graphics     ?
_computing_publication_material   ?
 
_refine_special_details
;
 Refinement of F^2^ against ALL reflections.  The weighted R-factor wR and
 goodness of fit S are based on F^2^, conventional R-factors R are based
 on F, with F set to zero for negative F^2^. The threshold expression of
 F^2^ > 2sigma(F^2^) is used only for calculating R-factors(gt) etc. and is
 not relevant to the choice of reflections for refinement.  R-factors based
 on F^2^ are statistically about twice as large as those based on F, and R-
 factors based on ALL data will be even larger.
;
 
_refine_ls_structure_factor_coef  Fsqd
_refine_ls_matrix_type            full
_refine_ls_weighting_scheme       calc
_refine_ls_weighting_details
 'calc w=1/[\s^2^(Fo^2^)+(0.0536P)^2^+0.7597P] where P=(Fo^2^+2Fc^2^)/3'
_atom_sites_solution_primary      direct
_atom_sites_solution_secondary    difmap
_atom_sites_solution_hydrogens    geom
_refine_ls_hydrogen_treatment     mixed
_refine_ls_extinction_method      SHELXL
_refine_ls_extinction_coef        0.025(3)
_refine_ls_extinction_expression
 'Fc^*^=kFc[1+0.001xFc^2^\l^3^/sin(2\q)]^-1/4^'
_refine_ls_number_reflns          3782
_refine_ls_number_parameters      298
_refine_ls_number_restraints      14
_refine_ls_R_factor_all           0.0581
_refine_ls_R_factor_gt            0.0476
_refine_ls_wR_factor_ref          0.1262
_refine_ls_wR_factor_gt           0.1181
_refine_ls_goodness_of_fit_ref    1.045
_refine_ls_restrained_S_all       1.061
_refine_ls_shift/su_max           0.002
_refine_ls_shift/su_mean          0.000
 
loop_
 _atom_site_label
 _atom_site_type_symbol
 _atom_site_fract_x
 _atom_site_fract_y
 _atom_site_fract_z
 _atom_site_U_iso_or_equiv
 _atom_site_adp_type
 _atom_site_occupancy
 _atom_site_symmetry_multiplicity
 _atom_site_calc_flag
 _atom_site_refinement_flags
 _atom_site_disorder_assembly
 _atom_site_disorder_group
O2' O 0.18982(14) 0.47760(13) 0.85048(11) 0.0237(3) Uani 1 1 d . . .
O3' O -0.09507(15) 0.30305(13) 0.66185(12) 0.0282(3) Uani 1 1 d . . .
O1' O 0.16078(16) 0.11136(13) 0.57186(11) 0.0291(3) Uani 1 1 d . . .
O4' O -0.00349(14) 0.19336(13) 0.79308(11) 0.0251(3) Uani 1 1 d . . .
O1 O 0.43142(15) 0.14937(13) 1.04890(11) 0.0261(3) Uani 1 1 d . . .
O2 O 0.34705(18) 0.36386(15) 1.40702(11) 0.0371(4) Uani 1 1 d . . .
C6' C 0.2742(2) 0.40087(18) 0.78276(15) 0.0210(4) Uani 1 1 d . . .
C2' C 0.2596(2) 0.21084(19) 0.63793(16) 0.0237(4) Uani 1 1 d . . .
C5' C 0.4360(2) 0.42285(19) 0.78107(16) 0.0237(4) Uani 1 1 d . . .
H5' H 0.4957 0.4938 0.8281 0.028 Uiso 1 1 calc R . .
C9' C 0.0138(2) 0.26647(18) 0.71733(15) 0.0208(4) Uani 1 1 d . . .
C1' C 0.1863(2) 0.29420(18) 0.71234(15) 0.0209(4) Uani 1 1 d . . .
C3 C 0.2353(2) 0.30114(19) 1.05171(16) 0.0242(4) Uani 1 1 d . . .
H3 H 0.2119 0.2862 0.9718 0.029 Uiso 1 1 calc R . .
C3' C 0.4209(2) 0.2315(2) 0.63584(17) 0.0269(5) Uani 1 1 d . . .
H3' H 0.4705 0.1755 0.5869 0.032 Uiso 1 1 calc R . .
C2 C 0.3472(2) 0.23665(18) 1.10560(16) 0.0227(4) Uani 1 1 d . A .
C5 C 0.1896(2) 0.4117(2) 1.23784(17) 0.0267(5) Uani 1 1 d . . .
H5 H 0.1355 0.4695 1.2814 0.032 Uiso 1 1 calc R . .
C7 C 0.3931(3) 0.1189(2) 0.92566(16) 0.0302(5) Uani 1 1 d . . .
H7A H 0.2810 0.0951 0.9033 0.045 Uiso 1 1 calc R . .
H7C H 0.4500 0.0503 0.8958 0.045 Uiso 1 1 calc R . .
H7B H 0.4225 0.1911 0.8954 0.045 Uiso 1 1 calc R . .
C4' C 0.5066(2) 0.3371(2) 0.70806(16) 0.0261(4) Uani 1 1 d . . .
H4' H 0.6150 0.3509 0.7075 0.031 Uiso 1 1 calc R . .
C6 C 0.3030(2) 0.3472(2) 1.29064(16) 0.0273(5) Uani 1 1 d . A .
O4 O 0.6490(2) 0.2621(2) 1.29730(14) 0.0581(6) Uani 1 1 d D . .
C4 C 0.1591(2) 0.3879(2) 1.11882(17) 0.0269(5) Uani 1 1 d . . .
H4 H 0.0848 0.4318 1.0828 0.032 Uiso 1 1 calc R . .
C8' C 0.2755(2) 0.5885(2) 0.92393(18) 0.0299(5) Uani 1 1 d . . .
H8'1 H 0.3572 0.5652 0.9772 0.045 Uiso 1 1 calc R . .
H8'2 H 0.2040 0.6356 0.9658 0.045 Uiso 1 1 calc R . .
H8'3 H 0.3227 0.6394 0.8781 0.045 Uiso 1 1 calc R . .
C1 C 0.3823(2) 0.2599(2) 1.22524(16) 0.0258(4) Uani 1 1 d . . .
C10' C -0.1642(2) 0.1622(2) 0.81298(17) 0.0276(5) Uani 1 1 d . . .
H10A H -0.2304 0.1178 0.7419 0.033 Uiso 1 1 calc R . .
H10B H -0.2111 0.2382 0.8420 0.033 Uiso 1 1 calc R . .
C8 C 0.2830(3) 0.4621(2) 1.47818(17) 0.0366(5) Uani 1 1 d . . .
H8B H 0.3050 0.5401 1.4548 0.055 Uiso 1 1 calc R . .
H8C H 0.3308 0.4696 1.5570 0.055 Uiso 1 1 calc R . .
H8A H 0.1703 0.4426 1.4707 0.055 Uiso 1 1 calc R . .
O3 O 0.4873(3) 0.09925(19) 1.31668(15) 0.0600(6) Uani 1 1 d . . .
C9 C 0.5081(3) 0.1951(3) 1.28421(17) 0.0387(6) Uani 1 1 d . A .
C11' C -0.1505(3) 0.0803(3) 0.9000(2) 0.0437(6) Uani 1 1 d . . .
H11A H -0.1038 0.0056 0.8701 0.066 Uiso 1 1 calc R . .
H11B H -0.2541 0.0573 0.9160 0.066 Uiso 1 1 calc R . .
H11C H -0.0846 0.1254 0.9697 0.066 Uiso 1 1 calc R . .
C7' C 0.2239(3) 0.0332(2) 0.4820(2) 0.0404(6) Uani 1 1 d . . .
H7'1 H 0.2616 0.0838 0.4324 0.061 Uiso 1 1 calc R . .
H7'2 H 0.1422 -0.0300 0.4382 0.061 Uiso 1 1 calc R . .
H7'3 H 0.3102 -0.0067 0.5153 0.061 Uiso 1 1 calc R . .
C10 C 0.7972(6) 0.2459(8) 1.3720(4) 0.0561(19) Uani 0.514(7) 1 d PDU A 1
H10C H 0.8088 0.3102 1.4421 0.067 Uiso 0.514(7) 1 calc PR A 1
H10D H 0.7820 0.1651 1.3938 0.067 Uiso 0.514(7) 1 calc PR A 1
C11 C 0.9194(6) 0.2502(8) 1.3362(7) 0.067(2) Uani 0.514(7) 1 d PDU A 1
H11D H 0.9081 0.1938 1.2625 0.100 Uiso 0.514(7) 1 calc PR A 1
H11E H 1.0008 0.2258 1.3890 0.100 Uiso 0.514(7) 1 calc PR A 1
H11F H 0.9481 0.3345 1.3280 0.100 Uiso 0.514(7) 1 calc PR A 1
C10A C 0.7709(7) 0.1844(8) 1.3444(5) 0.0489(18) Uani 0.486(7) 1 d PDU A 2
H10E H 0.8173 0.2297 1.4213 0.059 Uiso 0.486(7) 1 calc PR A 2
H10F H 0.7145 0.1070 1.3526 0.059 Uiso 0.486(7) 1 calc PR A 2
C11A C 0.8797(6) 0.1555(6) 1.2931(4) 0.0401(15) Uani 0.486(7) 1 d PDU A 2
H11G H 0.8924 0.2106 1.2408 0.060 Uiso 0.486(7) 1 calc PR A 2
H11H H 0.8567 0.0702 1.2506 0.060 Uiso 0.486(7) 1 calc PR A 2
H11I H 0.9758 0.1630 1.3473 0.060 Uiso 0.486(7) 1 calc PR A 2
 
loop_
 _atom_site_aniso_label
 _atom_site_aniso_U_11
 _atom_site_aniso_U_22
 _atom_site_aniso_U_33
 _atom_site_aniso_U_23
 _atom_site_aniso_U_13
 _atom_site_aniso_U_12
O2' 0.0222(7) 0.0227(7) 0.0225(7) -0.0036(5) 0.0031(5) 0.0015(5)
O3' 0.0251(7) 0.0290(8) 0.0294(7) 0.0054(6) -0.0009(6) 0.0085(6)
O1' 0.0313(7) 0.0245(8) 0.0274(7) -0.0051(6) 0.0044(6) 0.0055(6)
O4' 0.0201(6) 0.0304(8) 0.0246(7) 0.0068(6) 0.0013(5) 0.0024(5)
O1 0.0316(7) 0.0269(8) 0.0209(7) 0.0042(6) 0.0051(5) 0.0108(6)
O2 0.0491(9) 0.0466(10) 0.0190(7) 0.0063(7) 0.0062(6) 0.0278(8)
C6' 0.0241(9) 0.0239(10) 0.0155(8) 0.0047(8) 0.0019(7) 0.0073(8)
C2' 0.0278(10) 0.0227(11) 0.0199(9) 0.0037(8) 0.0012(7) 0.0059(8)
C5' 0.0236(9) 0.0263(11) 0.0204(9) 0.0053(8) -0.0004(7) 0.0038(8)
C9' 0.0253(10) 0.0176(10) 0.0167(9) -0.0020(7) -0.0001(7) 0.0060(7)
C1' 0.0232(9) 0.0221(10) 0.0174(9) 0.0045(8) 0.0004(7) 0.0058(8)
C3 0.0232(9) 0.0288(11) 0.0195(9) 0.0045(8) 0.0002(7) 0.0023(8)
C3' 0.0291(10) 0.0283(12) 0.0260(10) 0.0056(9) 0.0088(8) 0.0122(8)
C2 0.0229(9) 0.0212(10) 0.0249(10) 0.0050(8) 0.0057(7) 0.0040(8)
C5 0.0250(10) 0.0280(12) 0.0281(10) 0.0048(9) 0.0058(8) 0.0090(8)
C7 0.0379(11) 0.0313(12) 0.0215(10) 0.0026(9) 0.0057(8) 0.0112(9)
C4' 0.0209(9) 0.0325(12) 0.0271(10) 0.0107(9) 0.0033(8) 0.0064(8)
C6 0.0304(10) 0.0312(12) 0.0212(10) 0.0063(9) 0.0038(8) 0.0083(9)
O4 0.0358(9) 0.1119(18) 0.0358(9) 0.0280(10) 0.0036(7) 0.0391(10)
C4 0.0227(9) 0.0306(12) 0.0273(10) 0.0076(9) -0.0005(8) 0.0073(8)
C8' 0.0276(10) 0.0282(12) 0.0279(10) -0.0068(9) 0.0037(8) -0.0005(8)
C1 0.0286(10) 0.0282(12) 0.0229(10) 0.0085(8) 0.0039(8) 0.0100(8)
C10' 0.0209(9) 0.0346(12) 0.0252(10) 0.0018(9) 0.0033(8) 0.0016(8)
C8 0.0460(13) 0.0442(14) 0.0215(10) 0.0046(10) 0.0073(9) 0.0199(11)
O3 0.1005(15) 0.0556(13) 0.0368(9) 0.0221(9) 0.0154(9) 0.0512(11)
C9 0.0507(15) 0.0533(16) 0.0188(10) 0.0092(10) 0.0109(9) 0.0350(12)
C11' 0.0313(12) 0.0518(16) 0.0533(14) 0.0231(12) 0.0093(10) 0.0000(10)
C7' 0.0435(13) 0.0326(13) 0.0384(12) -0.0115(10) 0.0085(10) 0.0081(10)
C10 0.054(3) 0.083(5) 0.017(2) -0.024(3) -0.019(2) 0.050(3)
C11 0.029(3) 0.083(5) 0.097(5) 0.053(4) -0.009(3) 0.005(3)
C10A 0.046(3) 0.077(5) 0.017(3) -0.005(3) -0.012(2) 0.035(3)
C11A 0.029(3) 0.048(4) 0.043(3) 0.010(3) 0.002(2) 0.016(2)
 
_geom_special_details
;
 All esds (except the esd in the dihedral angle between two l.s. planes)
 are estimated using the full covariance matrix.  The cell esds are taken
 into account individually in the estimation of esds in distances, angles
 and torsion angles; correlations between esds in cell parameters are only
 used when they are defined by crystal symmetry.  An approximate (isotropic)
 treatment of cell esds is used for estimating esds involving l.s. planes.
;
 
loop_
 _geom_bond_atom_site_label_1
 _geom_bond_atom_site_label_2
 _geom_bond_distance
 _geom_bond_site_symmetry_2
 _geom_bond_publ_flag
O2' C6' 1.367(2) . ?
O2' C8' 1.429(2) . ?
O3' C9' 1.202(2) . ?
O1' C2' 1.362(2) . ?
O1' C7' 1.432(2) . ?
O4' C9' 1.336(2) . ?
O4' C10' 1.456(2) . ?
O1 C2 1.368(2) . ?
O1 C7 1.434(2) . ?
O2 C6 1.365(2) . ?
O2 C8 1.425(3) . ?
C6' C1' 1.391(3) . ?
C6' C5' 1.391(3) . ?
C2' C3' 1.386(3) . ?
C2' C1' 1.392(3) . ?
C5' C4' 1.383(3) . ?
C9' C1' 1.497(3) . ?
C3 C4 1.380(3) . ?
C3 C2 1.386(3) . ?
C3' C4' 1.384(3) . ?
C2 C1 1.391(3) . ?
C5 C4 1.382(3) . ?
C5 C6 1.389(3) . ?
C6 C1 1.390(3) . ?
O4 C9 1.336(3) . ?
O4 C10 1.486(4) . ?
O4 C10A 1.504(4) . ?
C1 C9 1.497(3) . ?
C10' C11' 1.497(3) . ?
O3 C9 1.193(3) . ?
C10 C11 1.187(5) . ?
C10A C11A 1.214(5) . ?
 
loop_
 _geom_angle_atom_site_label_1
 _geom_angle_atom_site_label_2
 _geom_angle_atom_site_label_3
 _geom_angle
 _geom_angle_site_symmetry_1
 _geom_angle_site_symmetry_3
 _geom_angle_publ_flag
C6' O2' C8' 116.91(14) . . ?
C2' O1' C7' 116.82(16) . . ?
C9' O4' C10' 117.21(14) . . ?
C2 O1 C7 116.71(15) . . ?
C6 O2 C8 117.52(15) . . ?
O2' C6' C1' 115.06(16) . . ?
O2' C6' C5' 124.77(17) . . ?
C1' C6' C5' 120.16(17) . . ?
O1' C2' C3' 125.07(17) . . ?
O1' C2' C1' 114.52(16) . . ?
C3' C2' C1' 120.40(18) . . ?
C4' C5' C6' 118.71(18) . . ?
O3' C9' O4' 124.04(17) . . ?
O3' C9' C1' 126.00(18) . . ?
O4' C9' C1' 109.96(15) . . ?
C6' C1' C2' 119.93(17) . . ?
C6' C1' C9' 120.64(16) . . ?
C2' C1' C9' 119.42(17) . . ?
C4 C3 C2 118.80(17) . . ?
C4' C3' C2' 118.66(18) . . ?
O1 C2 C3 124.40(17) . . ?
O1 C2 C1 115.26(16) . . ?
C3 C2 C1 120.33(18) . . ?
C4 C5 C6 118.32(18) . . ?
C5' C4' C3' 122.11(18) . . ?
O2 C6 C5 124.30(18) . . ?
O2 C6 C1 115.01(17) . . ?
C5 C6 C1 120.69(17) . . ?
C9 O4 C10 126.6(4) . . ?
C9 O4 C10A 106.5(4) . . ?
C10 O4 C10A 26.8(3) . . ?
C3 C4 C5 122.24(18) . . ?
C6 C1 C2 119.61(17) . . ?
C6 C1 C9 119.61(17) . . ?
C2 C1 C9 120.75(17) . . ?
O4' C10' C11' 106.46(16) . . ?
O3 C9 O4 124.5(2) . . ?
O3 C9 C1 125.9(2) . . ?
O4 C9 C1 109.6(2) . . ?
C11 C10 O4 119.2(5) . . ?
C11A C10A O4 120.2(5) . . ?
 
loop_
 _geom_torsion_atom_site_label_1
 _geom_torsion_atom_site_label_2
 _geom_torsion_atom_site_label_3
 _geom_torsion_atom_site_label_4
 _geom_torsion
 _geom_torsion_site_symmetry_1
 _geom_torsion_site_symmetry_2
 _geom_torsion_site_symmetry_3
 _geom_torsion_site_symmetry_4
 _geom_torsion_publ_flag
C8' O2' C6' C1' -179.79(17) . . . . ?
C8' O2' C6' C5' 0.4(3) . . . . ?
C7' O1' C2' C3' -9.7(3) . . . . ?
C7' O1' C2' C1' 170.96(17) . . . . ?
O2' C6' C5' C4' -179.97(17) . . . . ?
C1' C6' C5' C4' 0.2(3) . . . . ?
C10' O4' C9' O3' -3.3(3) . . . . ?
C10' O4' C9' C1' 177.05(15) . . . . ?
O2' C6' C1' C2' 178.61(16) . . . . ?
C5' C6' C1' C2' -1.6(3) . . . . ?
O2' C6' C1' C9' -2.6(2) . . . . ?
C5' C6' C1' C9' 177.18(16) . . . . ?
O1' C2' C1' C6' -178.79(16) . . . . ?
C3' C2' C1' C6' 1.8(3) . . . . ?
O1' C2' C1' C9' 2.4(2) . . . . ?
C3' C2' C1' C9' -176.93(17) . . . . ?
O3' C9' C1' C6' 88.6(2) . . . . ?
O4' C9' C1' C6' -91.7(2) . . . . ?
O3' C9' C1' C2' -92.6(2) . . . . ?
O4' C9' C1' C2' 87.1(2) . . . . ?
O1' C2' C3' C4' 179.95(18) . . . . ?
C1' C2' C3' C4' -0.8(3) . . . . ?
C7 O1 C2 C3 -3.6(3) . . . . ?
C7 O1 C2 C1 177.27(18) . . . . ?
C4 C3 C2 O1 -179.45(18) . . . . ?
C4 C3 C2 C1 -0.4(3) . . . . ?
C6' C5' C4' C3' 0.9(3) . . . . ?
C2' C3' C4' C5' -0.6(3) . . . . ?
C8 O2 C6 C5 -6.1(3) . . . . ?
C8 O2 C6 C1 173.14(19) . . . . ?
C4 C5 C6 O2 178.5(2) . . . . ?
C4 C5 C6 C1 -0.7(3) . . . . ?
C2 C3 C4 C5 -0.6(3) . . . . ?
C6 C5 C4 C3 1.2(3) . . . . ?
O2 C6 C1 C2 -179.50(19) . . . . ?
C5 C6 C1 C2 -0.2(3) . . . . ?
O2 C6 C1 C9 -1.4(3) . . . . ?
C5 C6 C1 C9 177.8(2) . . . . ?
O1 C2 C1 C6 179.95(18) . . . . ?
C3 C2 C1 C6 0.8(3) . . . . ?
O1 C2 C1 C9 1.9(3) . . . . ?
C3 C2 C1 C9 -177.2(2) . . . . ?
C9' O4' C10' C11' 179.83(17) . . . . ?
C10 O4 C9 O3 -12.6(4) . . . . ?
C10A O4 C9 O3 7.3(4) . . . . ?
C10 O4 C9 C1 166.3(3) . . . . ?
C10A O4 C9 C1 -173.7(3) . . . . ?
C6 C1 C9 O3 88.9(3) . . . . ?
C2 C1 C9 O3 -93.1(3) . . . . ?
C6 C1 C9 O4 -90.0(2) . . . . ?
C2 C1 C9 O4 88.0(2) . . . . ?
C9 O4 C10 C11 137.3(7) . . . . ?
C10A O4 C10 C11 90.7(9) . . . . ?
C9 O4 C10A C11A 122.7(7) . . . . ?
C10 O4 C10A C11A -94.9(11) . . . . ?
 
_diffrn_measured_fraction_theta_max    0.998
_diffrn_reflns_theta_full              25.00
_diffrn_measured_fraction_theta_full   0.998
_refine_diff_density_max    0.461
_refine_diff_density_min   -0.433
_refine_diff_density_rms    0.049
